1 **Loss of p32 triggers energy deficiency and impairs goblet cell differentiation in ulcerative**  
2 **colitis**

3 Annika Sünderhauf<sup>1</sup>, Maren Hicken<sup>1</sup>, Heidi Schlichting<sup>1</sup>, Kerstin Skibbe<sup>1</sup>, Mohab Ragab<sup>1</sup>, Annika  
4 Raschdorf<sup>1</sup>, Misa Hirose<sup>2</sup>, Holger Schäffler<sup>3</sup>, Arne Bokemeyer<sup>4</sup>, Dominik Bettenworth<sup>4</sup>, Anne G. Savitt<sup>5</sup>,  
5 Sven Perner<sup>6</sup>, Saleh Ibrahim<sup>2</sup>, Ellinor I. Peerschke<sup>7</sup>, Berhane Ghebrehiwet<sup>5</sup>, Stefanie Derer<sup>1#\*</sup>,  
6 Christian Sina<sup>1,8#\*</sup>

7 <sup>1</sup>*Institute of Nutritional Medicine, University Hospital Schleswig-Holstein, Campus Lübeck, Lübeck,*  
8 *Schleswig-Holstein, Germany.*

9 <sup>2</sup>*Lübeck Institute of Experimental Dermatology and Center for Research on Inflammation of the Skin,*  
10 *University of Lübeck, Lübeck, Schleswig-Holstein, Germany.*

11 <sup>3</sup>*Department of Medicine II, Division of Gastroenterology, Rostock University Medical Center, Rostock,*  
12 *Mecklenburg Western Pomerania, Germany.*

13 <sup>4</sup>*Department of Medicine B, Gastroenterology and Hepatology, University Hospital Münster, Münster,*  
14 *North Rhine-Westphalia, Germany.*

15 <sup>5</sup>*Department of Medicine, Stony Brook University, Stony Brook, NY, US.*

16 <sup>6</sup>*Institute of Pathology, University Hospital Schleswig-Holstein, Lübeck, Germany; Pathology*  
17 *of the Research Center Borstel, Leibniz Lung Center, Borstel, Germany.*

18 <sup>7</sup>*Department of Laboratory Medicine, Memorial Sloan Kettering Cancer Center, New York, NY, US.*

19 <sup>8</sup>*1st Department of Medicine, Section of Nutritional Medicine, University Hospital Schleswig-Holstein,*  
20 *Campus Lübeck, Lübeck, Schleswig-Holstein, Germany.*

21 # These authors share senior authorship.

22 **\*Corresponding authors:**

23 Stefanie Derer and Christian Sina  
24 Institute of Nutritional Medicine  
25 University Hospital Schleswig-Holstein, Campus Lübeck  
26 Ratzeburger Allee 160  
27 Tel: +49(0)451/3101 8401; Fax: +49(0)451/3101 8404  
28 Stefanie.derer@uksh.de; Christian.sina@uksh.de

29

30 **Word count:** 5755 (including main text without references or figure legends)

1 **Abstract**

2 Cell differentiation in the colonic crypt is driven by a metabolic switch from glycolysis to mitochondrial  
3 oxidation. Mitochondrial and goblet cell (GC) dysfunction have been attributed to the pathology of  
4 ulcerative colitis (UC). We hypothesized that p32/gC1qR/HABP1, which critically maintains oxidative  
5 phosphorylation, is involved in GC differentiation and hence in the pathogenesis of UC. In UC patients  
6 in remission, colonic GC differentiation was significantly decreased compared to controls in a p32-  
7 dependent manner. Plasma/serum lactate and colonic pAMPK level were increased, pointing at high  
8 glycolytic activity and energy deficiency. Consistently, *p32* silencing in mucus-secreting HT29-MTX  
9 cells abolished butyrate-induced differentiation and induced a shift towards glycolysis. In mitochondrial  
10 respiratory chain complex V-deficient mice, colonic p32 expression correlated with loss of  
11 differentiated GCs, resulting in a thinner mucus layer. Conversely, feeding mice an isocaloric glucose-  
12 free, high-protein diet increased mucosal energy supply that promoted colonic p32 level, GC  
13 differentiation and mucus production. We here describe a new molecular mechanism linking mucosal  
14 energy deficiency in UC to impaired p32-dependent GC differentiation that may be therapeutically  
15 prevented by nutritional intervention.

16

## 1 INTRODUCTION

2 Ulcerative colitis (UC), as one main phenotype of inflammatory bowel disease (IBD), is a chronic,  
3 relapsing-remitting immune mediated disorder of the human gastrointestinal tract, in which  
4 inflammation is localized to the large intestine and restricted to the mucosa. While the exact  
5 pathophysiology is still not fully understood, genetic, environmental and immune-mediated factors  
6 contribute to disease onset and recurrence in UC. Loss of intestinal epithelial and mucus barrier  
7 integrity leading to bacterial translocation is commonly accepted as a major cause of inflammation (1).  
8 Correct cellular differentiation, which is pivotal for the cryptic architecture and thus barrier integrity, is a  
9 highly energy demanding process (2), strongly suggesting that mitochondrial dysfunction plays a key  
10 role in both the onset and recurrence of the disease. Of main interest, mitochondrial dysfunction in  
11 epithelial cells, defective goblet cell differentiation and mucus depletion in UC have been  
12 independently reported in several studies (3-9). Nevertheless, mechanistic evidence linking cellular  
13 energy metabolism to goblet cell differentiation and UC pathogenesis is still missing.

14 Cells of the colonic mucosa utilize different mechanisms to maintain their energy homeostasis. Energy  
15 generation in cells of the lower third of the crypt ( e.g. intestinal stem cells) mainly depend on gly-  
16 colysis, while short chain fatty acids (SCFA) inhibit stem/progenitor cell proliferation (10, 11). In  
17 contrast, differentiated post-mitotic cells of the upper third of the crypt (e.g. goblet cells) maintain their  
18 energy level through mitochondrial  $\beta$ -oxidation of SCFA such as butyrate as well as long-chain fatty  
19 acids and the oxidative phosphorylation (OXPHOS) system (2, 11-13). We recently reported a cellular  
20 mechanism, whereby caspase-1 dependent cleavage of p32, a protein that critically maintains  
21 OXPHOS function, induces a metabolic shift from mitochondrial OXPHOS to cytosolic aerobic  
22 glycolysis (14). This metabolic shift led to an enhancement of cell proliferation and a decrease in cell  
23 differentiation of cancer cells and is potentially involved in the transition of transient amplifying cells  
24 into post mitotic cells.

25 In the intestinal crypt, differentiation of goblet cells occurs along the metabolic trajectory of shifting  
26 energy source. Secretory precursor cells in the transit amplifying zone are characterized by high  
27 expression of atonal basic helix-loop-helix transcription factor 1 (*ATOH1*, also referred to as *HATH1* in  
28 humans and *Math1* in mice) (15) and further by high level of SAM pointed domain-containing Ets  
29 transcription factor (*SPDEF1*) (16). Kruppel-like factor 4 (*KLF4*) expressing, terminally differentiated  
30 goblet cells are particularly specialized in the production and secretion of highly glycosylated proteins,

1 so called mucins, with mucin 2 (MUC2) being the most abundant in the colon and small intestine.  
2 Notably, *klf4*-deficient mice display defective goblet cell differentiation with a decrease of about 90% of  
3 colonic goblet cells (17). Reduced numbers of goblet cells in line with colonic mucus depletion have  
4 been suggested as histological hallmarks of UC (6). Gersemann *et al.* showed, that induction of goblet  
5 cell differentiation during inflammation is impaired in UC but not in Crohn's disease (CD) (8).  
6 Furthermore, differentiation defects of intestinal stem cells have been found to be accompanied by a  
7 barrier dysfunction, leading to intestinal inflammation and/or cancer development (18).

8 The OXPHOS system has been found to be highly active in goblet cells (2). Therefore, differentiated  
9 goblet cells are expected to be highly affected by reduced OXPHOS activity. Supporting this  
10 hypothesis, we recently published that loss of OXPHOS-stabilizing p32 by inflammasom-driven  
11 cleavage reduces goblet cell differentiation state, *in vitro* (14).

12 In 1980, Roediger *et al.* hypothesized, that pathogenesis of UC is linked to energy-deficiency. More  
13 specifically, the authors found reduced butyrate oxidation rates in isolated colonocytes from UC  
14 patients compared to healthy controls (3). Furthermore, two independent studies reported reduced  
15 mitochondrial respiratory chain complex activity accompanied by mucosal ATP depletion in UC  
16 patients (4, 5). Interestingly, alterations in all three studies were already present in non-inflamed  
17 tissue, implicating mitochondrial dysfunction as a pathophysiological cause rather than consequence  
18 in UC.

19 The ubiquitous nuclear encoded multi-functional protein p32 critically maintains OXPHOS and was  
20 independently identified as a subunit of the human pre-mRNA splicing factor SF2 (19, 20), as  
21 complement component 1q binding protein (C1qbp, gC1qR) (21) and as hyaluronic acid binding  
22 protein (HABP1) (22). P32 expression is integral to mitochondrial energy maintenance, with energy  
23 generation *via* OXPHOS being nearly absent in *p32* knockout cells (14, 23) and *p32*-deficient mice  
24 being embryonic lethal (24). Cumulative data indicate that one of the major functions of p32 is to  
25 maintain mitochondrial function by regulating mitochondrial protein translation (24, 25).

26 Taken together, we hypothesized p32 to be involved in the maintenance of the metabolic trajectory  
27 within the intestinal crypt, thereby enabling the metabolic switch from glycolysis to mitochondrial  
28 OXPHOS, which is necessary for terminal differentiation of intestinal stem cells towards goblet cells.  
29 Since mitochondrial dysfunction and defects in goblet cell differentiation have been attributed to UC

- 1 pathogenesis, we aimed at investigating colonic expression of p32 in UC patients, as well as studying
- 2 mechanistic backgrounds and possible modulation of OXPHOS driven goblet cell differentiation.

## 1 RESULTS

### 2 UC patients in remission display decreased colonic p32 expression, increased glycolysis and 3 cellular energy deficiency.

4 Stem cells in the lower part of the colonic crypt are mainly dependent on glycolysis, while there is a  
5 gradient towards an increase in energy generation *via* OXPHOS and a decrease in glycolysis towards  
6 the differentiated cells at the tip of the crypt (2, 10, 12). Cellular differentiation occurs alongside this  
7 gradient of shifting energy source (**Figure 1A**) and we postulated p32 as a main driver of  
8 mitochondrial OXPHOS to be involved in its maintenance. Indeed, p32 is highly expressed in the  
9 upper part of the colonic crypt, together with mitochondrial marker TOMM22 and goblet cell  
10 differentiation marker KLF4 (**Figure 1B and C**). When p32 mRNA expression was analyzed in a cohort  
11 of intestinal biopsies (ileum to sigmoidal colon) from 15 non-IBD controls and 22 UC patients in  
12 remission, we found reduced p32 level in UC patients (**Table 1 and Figure 1D**). Expression data from  
13 ileal and colonic biopsies were combined, since p32 mRNA expression did not differ between ileal and  
14 colonic tissue within patients (**Figure 1E**). At least two isoforms of p32 have been described, one  
15 encoding and one lacking the mitochondrial leader sequence in exon 1 (26). Hence, we investigated  
16 exon expression in a subset of intestinal biopsies from 10 non-IBD controls and 9 UC patients in  
17 remission. Expression of all exons, and therefore most likely all isoforms, of the p32 transcript were  
18 reduced in the intestine of UC patients compared to non-IBD controls (**Figure 1F and Supplementary**  
19 **Figure 1A**).

20 Due to the fact that mitochondrial function is highly affected by ageing (27) and various therapeutic  
21 regimens, we related p32 mRNA expression to patients' age and tested for potential influences of  
22 commonly prescribed therapeutics within our cohort such as prednisolone, mesalazine and  
23 azathioprine. P32 mRNA expression did not correlate with age in either non-IBD controls or UC  
24 patients (**Supplementary Figure 1B**). In line with previous studies, which showed azathioprine to  
25 impair cell proliferation (28), azathioprine treatment was associated with higher p32 mRNA level in UC  
26 patients, an effect neither observed under mesalazine nor prednisolone therapy (**Supplementary**  
27 **Figure 1C and D**). Therefore, biopsies from patients receiving azathioprine treatment were excluded  
28 from data presented in Figure 1 and 2.

1 To investigate whether differences in *p32* mRNA level are also reflected on protein level, a set of ten  
2 colonic biopsies collected from non-IBD patients was compared to nine colonic biopsies collected from  
3 UC patients in remission *via* IHC staining of the *p32* protein (clone EPR8871). *P32* staining was  
4 densitometrically quantified in the upper third of the crypt and revealed a significantly lower *p32*  
5 positive area in UC patients compared to non-IBD controls (**Table 1** and **Figure 1G**). Further, UC  
6 patients displayed increased L-lactate level in plasma/serum samples compared to non-IBD controls  
7 as well as high phosphorylation of AMPK in colonic biopsies, pointing to increased glycolysis activity  
8 and mucosal energy deficiency in UC patients. (**Table 2** and **Figure 1H-J**).

9 **Colonic goblet cell differentiation is impaired in UC patients in remission and goblet cell**  
10 **number decreases with increasing degree of inflammation.**

11 High glycolytic activity characterizes cell metabolism in proliferating precursor cells rather than in non-  
12 dividing differentiated cells (10). Since goblet cell function has been previously proposed to be  
13 impaired in UC (3, 7, 8), we focused on analyzing differentiation status of this cell entity. Interestingly,  
14 expression of terminal goblet cell differentiation marker *KLF4* was significantly downregulated in  
15 colonic biopsies (hepatic flexure to sigmoid colon) from UC patients in remission compared to non-IBD  
16 controls (**Figure 1K**). Additionally, colonic *KLF4* mRNA expression significantly correlated with *p32*  
17 mRNA expression (**Figure 1L**), supporting the hypothesis, that impaired terminal goblet cell  
18 differentiation in UC is a result of defective energy generation *via* *p32*-driven OXPHOS. Meanwhile,  
19 transcript levels of goblet cell precursor markers *ATOH1* and *SPDEF1* were not statistically different  
20 (**Figure 1K**).

21 In the next set of experiments, we analyzed *p32* expression and goblet cell appearance in non-  
22 inflamed and inflamed tissue sections of UC patients in remission or active disease. Inflammasomes,  
23 as part of the innate immune system, are responsible for the initiation of inflammatory responses,  
24 mediated by the activation of caspase-1 among others (29). We have recently published, that active  
25 caspase-1 cleaves *p32* at two distinct sites (exon 1-2 junction and in exon 5), thereby preventing  
26 mitochondrial import of *p32*. This mechanism results in a shift in energy generation of tumor cells from  
27 OXPHOS towards aerobic glycolysis (**Figure 2A**) and abrogation of differentiation of goblet cell-like  
28 HT29-MTX cells, *in vitro* (14). On mRNA level, *p32* was upregulated in inflamed tissue biopsies  
29 compared to samples from non-inflamed regions within patients with active UC (**Figure 2B**). Of note,  
30 protein expression of pro-caspase 1 was reduced in inflamed but not non-inflamed tissue areas of UC

1 patients indicating inflammasome activation in respective regions. Consistent with reported caspase-1  
2 induced p32 cleavage, binding of an antibody against p32 exon 6 was reduced in UC inflamed tissue  
3 sections compared to non-IBD controls in a disease activity dependent manner. Furthermore, blinded  
4 evaluation of PAS-Alcian blue staining revealed reduced staining intensity of goblet cell granules in  
5 UC non-inflamed tissue compared to non-IBD controls under basal conditions. The amount of mucus-  
6 filled goblet cells was reduced under low grade inflammation and further decreased with increasing  
7 degree of mucosal inflammation (**Table 1, Figure 2D** and **Supplementary Figure 2**). Overall, these  
8 findings support our previous observation that caspase-1 cleavage of p32 leads to abrogation of  
9 goblet cell differentiation (14), thereby further reducing mitochondria-localized and functional p32 and  
10 differentiated goblet cells in UC.

### 11 **Goblet cell differentiation is dependent on OXPHOS and p32 *in vitro*.**

12 To test our hypothesis that OXPHOS-driven goblet cell differentiation in the intestinal crypt is  
13 dependent on p32, we next screened a range of human colorectal carcinoma cell lines for expression  
14 of goblet cell differentiation markers, *MUC2*, *Mucin5AC* (*MUC5AC*) and *p32*. HT29-MTX cells depicted  
15 high basal mRNA level of *SPDEF1*, indicating a goblet cell precursor phenotype as well as *MUC5AC*  
16 but not *MUC2*. While DiFi cells showed high levels of both *ATOH1* and *KLF4*, the analyses of T84  
17 cells indicated terminal differentiation reflected by high expression of *KLF4* and *MUC2*. All these three  
18 goblet cell-like cell lines similarly expressed *p32* mRNA (**Supplementary figure 3A**). To find an  
19 inducible cell line model to study dependency of goblet cell differentiation on mitochondrial activity *in*  
20 *vitro*,  $\beta$ -oxidation and hence OXPHOS in HT29-MTX, T84 and DiFi cells was boosted through  
21 stimulation with the short-chain fatty acid butyrate in the presence or absence of the proinflammatory  
22 stimulus LPS, frequently present in the intestine (**Figure 3A** and **B**). Butyrate stimulation induced  
23 terminal goblet cell differentiation of HT29-MTX but not of T84 or DiFi cells, reflected by induction of  
24 *KLF4* expression, which was abrogated in the presence of LPS (**Figure 3B** and **G**). Butyrate-triggered  
25 terminal goblet cell differentiation of HT29-MTX cells was accompanied by an increase in oxygen  
26 consumption rate (OCR) but not in extracellular acidification rate (ECAR) (**Figure 3C**) (14), underlining  
27 the importance of a metabolic switch towards OXPHOS in goblet cell differentiation. Furthermore,  
28 differentiated HT29-MTX cells displayed increased mucin granule formation, decreased cell  
29 proliferation and enhancement of secreted Muc5AC (**Figure 3D-G**). Of note, *p32* mRNA expression  
30 was not altered upon butyrate stimulation (**Supplementary Figure 3B**). To test whether goblet cell



1 differentiation is indeed dependent on p32, we performed siRNA-induced silencing experiments in  
2 HT29-MTX cells. Of main interest, induction of goblet cell differentiation *via* butyrate was abrogated in  
3 p32-silenced HT29-MTX cells accompanied by increased lactate level, indicating a switch in energy  
4 metabolism towards aerobic glycolysis. Thus, supporting the idea that p32 maintains mitochondrial  
5 function and thereby ensures goblet cell differentiation (**Figure 3H and I**). OXPHOS is a lot more  
6 efficient in the production of ATP compared to aerobic glycolysis. Therefore, we proposed a pivotal  
7 role for cellular energy supplied by the mitochondrial OXPHOS system not only for goblet cell  
8 differentiation, but also for mucus secretion. To test this hypothesis, HT29-MTX cells were first  
9 terminally differentiated by post-confluent growth (30) (**Supplementary Figure 3C**), followed by  
10 stimulation with OXPHOS complex V blocker oligomycin or the uncoupling agent DNP (**Figure 3J**). As  
11 expected, blocking of OXPHOS function by oligomycin resulted in a shift of cellular energy metabolism  
12 from OXPHOS to glycolysis (**Figure 3K**). Moreover, mucus secretion was impaired by oligomycin as  
13 well as by DNP, reflected by a dose-dependent downregulation of secreted but not intracellular  
14 Muc5AC (**Figure 3L and Supplementary Figure 3D and E**), supporting the idea that mucus secretion  
15 is a highly energy demanding process enabled by efficient OXPHOS activity.

#### 16 **ATP8-mutant mice display low colonic p32 expression in concert with loss of OXPHOS and** 17 **goblet cells.**

18 To investigate the observed UC phenotype of low colonic p32 level, energy deficiency and defective  
19 goblet cell differentiation in a mouse model, we applied conplastic respiratoty chain complex V-mutant  
20 mice. These mice carry a mutation in the mitochondrial encoded ATP8-synthase resulting in  
21 diminished respiratory capacity and ATP production with parallel induction of energy generation *via*  
22 non-mitochondrial glycolysis in various cell entities (31-33) (**Figure 4A**). Specifically, we found that  
23 ATP8-mutant mice displayed reduced p32 mRNA expression and diminished p32 protein level  
24 especially in differentiated intestinal epithelial cells in the upper part of colonic crypts (**Figure 4B and**  
25 **C**), while serum L-lactate levels were similar between strains (**Supplementary Figure 4A**). In line with  
26 the phenotype observed in UC patients, loss of p32 in ATP8-mutant mice was associated with altered  
27 colonic goblet cell differentiation represented by decreased *klf4* mRNA expression, diminished mucus  
28 filling of goblet cells and a reduced thickness of the colonic mucus layer. Further, *KLF4* mRNA  
29 expression significantly correlated with p32 mRNA expression in colonic samples from B6-wt and  
30 ATP8-mutant mice (**Figure 4D-F**). Expression of *atoh1* and *spdef1* was not altered which was

1 comparable to observations in UC patients (**Figure 4D**). Furthermore, expression of the proliferation  
2 marker *ki67* and the stem cell marker *lgr5* were not different in colonic biopsies from ATP8-mutant  
3 mice (**Supplementary Figure 4B**). Taken together, we here present a mouse model with low intestinal  
4 p32 level and diminished energy generation via OXPHOS to depict reduced numbers of terminally  
5 differentiated goblet cells in the colon, strengthening the notion that especially goblet cell  
6 differentiation is highly sensitive to mitochondrial dysfunction.

### 7 **A glucose-free nutritional intervention promotes colonic p32 expression and goblet cell** 8 **differentiation in mice.**

9 Finally, we aimed to study regulation of goblet cell differentiation *via* the enhancement of intestinal p32  
10 expression in a glucose-free, high-protein nutritional intervention in mice. Since availability of nutrients  
11 critically affects cellular metabolism (34), we hypothesized that withdrawal of glucose from the diet and  
12 isocaloric replacement of glucose by the protein casein may result in a metabolic shift towards  
13 mitochondrial oxidation (**Figure 5A**). Adult C57BL/6 mice were fed a glucose-free high-protein (GFHP)  
14 or an isocaloric control diet (ctrl) for an average of 70 days before organ sampling and molecular  
15 analysis. Food consumption, body weight, serum glucose and lactate level were similar between diets  
16 (**Figure 5B and C, Supplementary Figure 4C and D**). Of main interest, GFHP diet fed mice exhibited  
17 increased p32 protein level in the upper part of the colonic crypt which was not due to elevated *p32*  
18 mRNA level (**Figure 5D-F**). Simultaneously, GFHP diet fed mice displayed high colonic energy level  
19 reflected by low phosphorylation of AMPK (**Figure 5E**). Eventually, we tested whether enhanced p32  
20 expression would also result in enhanced goblet cell differentiation. In comparison to control mice,  
21 increased KLF4 mRNA and protein expression as well as a thicker colonic mucus layer were potent  
22 indicators for induction of terminal differentiation of goblet cells under GFHP diet (**Figure 5G and H**).  
23 Further, *spdef1* as a marker for secretory progenitor cells was reduced in GFHP diet mice supporting  
24 the idea, that p32 expression is pivotal for the transition from secretory precursors towards terminal  
25 differentiated goblet cells (**Figure 5G**). Expression of intestinal stem cell marker *lgr5* and proliferation  
26 marker *ki67* were unaltered upon GFHP diet (**Supplementary Figure 4E**). Taken together, nutritional  
27 intervention by glucose restriction in the presence of high protein intake appears as a promising tool to  
28 enhance colonic p32, thereby improving cellular energy supply and finally promoting goblet cell  
29 differentiation.

30

## 1 DISCUSSION

2 Within the colonic crypt, mitochondria maintain the energy gradient, which is necessary for efficient  
3 cell differentiation and proliferation and thereby critical in determination of IEC fate (2, 10, 12).  
4 Mitochondrial disturbance and dysfunction of goblet cells are hallmarks of UC pathology (3-6, 13),  
5 which presents as a multifactorial disease, where inflammation is caused by a disruption of the colonic  
6 epithelial and mucus barrier. Terminally differentiated goblet cells have a pivotal role in the  
7 maintenance of intestinal barrier integrity and their differentiation is presumably regulated by a  
8 metabolic switch from glycolysis to mitochondrial OXPHOS (2, 17). In order to understand the  
9 molecular basis and disease origin of UC, it is necessary to find the underlying cause of mitochondrial  
10 dysfunction and to unravel a potential link to impaired goblet cell function.

11 Both IBD subtypes, UC and CD, are disorders of the gastrointestinal tract, which display dysfunctional  
12 mitochondria. Nevertheless, while mitochondrial disturbance results in aberrant development of  
13 Paneth cells in CD (35), we here present abrogation of goblet cell differentiation through insufficient  
14 mitochondrial respiration as a potential cause for disease development in UC. Impaired induction of  
15 goblet cell differentiation in inflamed UC but not CD has been previously reported (8). Our data  
16 indicate that defective terminal differentiation of goblet cells is already present in non-inflamed colonic  
17 tissue of UC patients in remission, defined by diminished mucus filling of goblet cells and reduced  
18 expression of terminal goblet cell differentiation marker *KLF4* compared to non-IBD controls. In line  
19 with this tenet, reduced numbers of goblet cells and a defective colonic mucus layer enabling bacterial  
20 invasion were already published for UC patients in remission (6, 7, 9, 36). While the reason for  
21 mitochondrial dysfunction in CD is still unknown, data presented here suggest that loss of p32, which  
22 is postulated to be the main driver of OXPHOS, is the underlying cause of metabolic dysfunction and  
23 secondarily of defective goblet cell function in UC. Interestingly, p32 has been previously proposed to  
24 be dysregulated before disease onset of UC but not CD, strengthening its role as a potential causative  
25 factor in disease development (37).

26 In addition to the observation that low p32 expression is accompanied by mitochondrial dysfunction  
27 and defective goblet cell maturation in UC, we present experimental evidence that induction of goblet  
28 cell differentiation is dependent on p32-regulated mitochondrial function *in vitro*. Stimulation of a  
29 mucus producing goblet cell-like cell line with the SCFA butyrate resulted in induction of OXPHOS and  
30 terminal differentiation. Of main interest, differentiation was abolished by *p32* silencing and mucus

1 secretion was impaired after treatment with OXPHOS inhibitors. In line with these observations,  
2 polymorphisms in nuclear encoded mitochondrial genes involved in ATP generation, namely  
3 uncoupling protein 2 (*UCP2*) and *SLC22A5*, encoding the organic carnitine transporter 2 (*OCNT2*),  
4 have been described as risk factors for UC (38, 39). In addition, inhibition of intestinal fatty acid  $\beta$ -  
5 oxidation as well as genetic ablation of *UCP2* or *OCNT2* in mice resulted in experimental colitis (3, 40,  
6 41). Conversely, conplastic mice with high mucosal OXPHOS and ATP levels have been already  
7 demonstrated by our group to be protected from experimental colitis (42).

8 Apart from its role as a regulator of mitochondrial function, p32 has been described to interact with  
9 various proteins localized on the cell surface, the nucleus, the cytoplasm or the extracellular space  
10 (43). Binding of p32 to the globular heads of C1q reportedly inhibits classical pathway complement  
11 activation (21). Furthermore, interaction of p32 with serum proteins involved in blood clotting and fibrin  
12 polymerization as well as binding to various bacterial or viral antigens (44), might play a role in the  
13 prevention of intestinal inflammation. Whether low levels of p32 observed in UC might lead to  
14 impairment in any of the mentioned pathways, will be a topic of further investigations.

15 Here, we describe high level of KLF4-expressing terminally differentiated goblet cells as a healthy  
16 state and as necessary for mucus barrier integrity. In ATP8-mutant mice, carrying a mutation in  
17 complex V of the respiratory chain, we observed low colonic expression of p32 accompanied by  
18 reduced *klf4* mRNA expression, a diminished number of goblet cells and a thinned mucus layer. The  
19 transcription factor KLF4 specifically controls goblet cell fate, since in mice with intestinal deletion of  
20 *klf4* both colonocytes and enteroendocrine cells appear to undergo normal maturation. Additionally,  
21 cell proliferation and cell death rates appear unchanged in *klf4*-deficient mice, while goblet cell  
22 numbers are reduced by 90% (17). In general, goblet cells are recognized to be a major line of  
23 defense in the intestinal mucosa. The two-layered colonic mucus system separates bacteria from the  
24 host epithelium and the continuous self-renewal pushes bacteria out into the lumen, while animals with  
25 a penetrable mucus layer develop spontaneous colitis (36). Notably, high KLF4 levels suppress  
26 development and progression of intestinal neoplasia and colitis-associated colorectal cancer upon  
27 azoxymethane (AOM)/dextran sulfate sodium (DSS) treatment in mice (45).

28 Proliferation rather than differentiation of intestinal epithelial cells is highly important for tissue repair  
29 during active UC. Additionally, mitochondrial dysfunction in the colonic epithelium of patients with  
30 active UC has been reported to be accompanied by a reduction in fatty acid oxidation (13). We have

1 recently published, that caspase-1 mediated cleavage of p32 results in a metabolic switch from  
2 mitochondrial oxidation to glycolysis, thereby shifting cell fate towards proliferation (14). In line, mice  
3 deficient for caspase-1 display defects in mucosal tissue repair, being detrimental under DSS-induced  
4 colitis, while derepression of the inflammasome complex results in enhanced repair and resistance to  
5 acute colitis (46). Here, we demonstrate caspase-1 to be indeed activated in inflamed colonic tissue  
6 sections of UC patients, accompanied by a reduction of antibody binding against p32 exon 6 and a  
7 decrease of differentiated goblet cells. Taken together, loss of p32 in non-inflamed colonic tissue  
8 appears highly problematic, due to a decrease in differentiated goblet cells and thereby impaired  
9 mucus barrier function. Meanwhile, during colitis, p32 cleavage might be a physiologic mechanism  
10 necessary for induction of rapid cell proliferation for tissue repair.

11 We here propose nutritional intervention as a potential strategy to improve colonic p32 expression. A  
12 westernized diet, rich in glucose, is a major environmental factor contributing to UC (47) and was  
13 found to continuously activate the NLRP3 inflammasome (48, 49). Having shown, that caspase-1  
14 mediated cleavage of p32 boosts cell proliferation (14), we *vice versa* proposed an isocaloric glucose-  
15 free, high-protein diet to result in increased p32-mediated goblet cell differentiation. Indeed, mice  
16 receiving a GFHP diet exhibited induction of p32 protein expression in the colon, which was not due to  
17 elevated *p32* mRNA level compared to controls. In line with human and *in vitro* data, GFHP mice  
18 depicted high mucosal energy level, an increased number of KLF4-positive terminally differentiated  
19 goblet cells, and a thickening of the colonic mucus layer compared to controls. Considering this,  
20 dietary intervention appears as a promising tool to modulate p32 expression, mitochondrial function,  
21 and goblet cell differentiation in the intestine.

22 In conclusion, we identified a new pathway linking low colonic expression of OXPHOS-regulating p32  
23 to mitochondrial dysfunction, defective goblet cell differentiation and impaired mucus barrier formation,  
24 frequently observed in UC. Furthermore, we present a diet low in glucose as an option to induce  
25 colonic expression of p32, opening new pathways in the preventive treatment and therapy of UC.

## 1 MATERIALS AND METHODS

### 2 Study cohort

3 Tissue biopsies from the terminal ileum and colon were obtained during endoscopy as part of regular  
4 patient management in the medical department 1, University Hospital Schleswig-Holstein Campus  
5 Lübeck, Germany. Blood samples were collected at the University Hospital Schleswig-Holstein  
6 Campus Lübeck, at the University Hospital Münster, North Rhine-Westphalia, Germany and at the  
7 University Hospital Rostock, Mecklenburg Western Pomerania, Germany. Characteristics of  
8 histologically confirmed UC patients and non-IBD controls at time of endoscopy or sample collection  
9 are listed in table 1 and 2, respectively. The control group included patients who presented for a  
10 regular check-up or underwent endoscopy due to non-IBD related reasons and presented without  
11 macroscopically and histological evidence of mucosal inflammation. Diagnosis of UC and classification  
12 of patients into remission and disease flare was based on clinical, endoscopic and histopathologic  
13 findings. Categorization into inflamed and non-inflamed tissue was solely based on histopathologic  
14 presentation. Groups were age and gender- matched. Non-IBD controls or UC patients with reported  
15 colon cancer were excluded from the study. All patients gave informed consent for sample donation  
16 and protocols were approved by the ethics committees of the University of Lübeck (0-073; 03-043; AZ  
17 13/084A; AZ 05-112), the University of Münster (AZ 2016-305-b-S) and the University of Rostock (A  
18 2017-0137).

### 19 Animal experiments

20 All animal experiments were approved by the ethics committee, Schleswig-Holstein, Germany  
21 (C57BL/6FVB: V 242 – 63560/2017 (5-1/18); nutritional intervention: V 242 – 27664/2018 (64-5/17)).  
22 Mice were maintained at the University of Lübeck under specific pathogen-free conditions at a regular  
23 12-hour light–dark cycle with free access to food (Altromin #1324, Lage, Germany, if not indicated  
24 differently) and water. Procedures involving animals and their care were conducted in accordance with  
25 national and international laws and regulations.

26 C57BL/6J mice were obtained from Jackson Laboratory (Bar Harbor, US) and bred in the animal  
27 facility of the University of Lübeck. The conplastic strain C57BL/6J-mt<sup>FVB/NJ</sup> which carries a mutation in  
28 the mitochondrially encoded ATP synthase membrane subunit 8 (ATP8-mutant) was generated as  
29 described previously (31) and was maintained by repeatedly backcrossing female conplastic offspring

1 with male C57BL/6J mice. Here, basal 2.5 to 4 months old male ATP8-mutant mice and corresponding  
2 C57BL/6J controls (B6-wt) were sampled in three independent rounds. Due to differences in basal  
3 mRNA expression of targets of interest, expression data was normalized to average B6-wt target  
4 expression for each individual experiment.

5 Glucose free high protein (GFHP) and isocaloric control (ctrl) diet were purchased from Ssniff (Soest,  
6 Germany). Compositions of corresponding diets are specified in **supplementary table 1**. C57BL/6  
7 mice were ordered at an age of 7-8 weeks from Charles River (Wilmington, Massachusetts, US), were  
8 left to acclimatize on a standard chow diet until an age of 20 weeks and were then randomly  
9 distributed into GFHP-diet and isocaloric ctrl diet receiving groups. Mice were kept on the  
10 corresponding diet on an average of 70 days before sampling. Food consumption and body weight  
11 were measured once a week. Dietary intervention was performed in two independent experimental  
12 rounds.

### 13 **Cell culture**

14 The human colorectal carcinoma cell lines HT29-MTX-E12 (Sigma Aldrich, St. Louis, US) and DiFi  
15 (50) were kept in DMEM medium supplemented with or without 1% non-essential amino acids,  
16 respectively. The human colorectal carcinoma cell line T84 was kindly provided by Markus Huber-  
17 Lang, University Hospital Ulm, Baden-Wuerttemberg, Germany and grown in DMEM/F12 1:1 Medium  
18 containing 1.5% HEPES. All cell culture media were supplemented with 10% (v/v) heat-inactivated  
19 FCS, 100 U/ml penicillin, and 100 mg/ml streptomycin. Cells were incubated at 37 °C and 5% CO<sub>2</sub> in a  
20 humidified incubator. Cells were cultivated up to a maximum of 20 passages and confirmed to be  
21 negative for mycoplasma contamination every three months and when freshly thawed.

22 For terminal differentiation, HT29-MTX cells were either grown post confluent for 9 days as described  
23 previously (30) or stimulated with 1.25 mM butyrate (Merck Millipore, Burlington, Massachusetts, US)  
24 for 72 h in the presence or absence of 1 µg/ml LPS-EB ultrapure (InvivoGen, San Diego, California,  
25 US). 2,4-Dinitrophenol (DNP; SantaCruz, Dallas, Texas, US) or Oligomycin (Agilent, Santa Clara,  
26 California, US) were applied at indicated concentrations for 24 hours to inhibit mitochondrial  
27 respiration. Further, HT29-MTX cells were transiently transfected with 50 µM silencing RNA (siRNA)  
28 specific for human *p32* (exon 3; s2138; Thermo Fisher Scientific, Waltham, Massachusetts, US) or  
29 control siRNA (Thermo Fisher Scientific) by reverse lipofection using Lipofectamine 3000 reagent

1 (Thermo Fisher Scientific) for 96 hours or were left untreated. After 24 hours, cells were stimulated  
2 with 1.25 mM butyrate for 72 hours or were left untreated.

### 3 **RNA extraction, cDNA synthesis and quantitative real-time PCR**

4 Isolation of total RNA from tissue biopsies or cell pellets was performed using the innuPREP RNA Mini  
5 Kit (Analytic Jena AG, Jena, Germany) according to manufacturer's guidelines. Additional DNA  
6 digestion was performed two times after binding of RNA to RNA-column with 4 units DNase (Sigma  
7 Aldrich) in according reaction buffer for 20 min at RT. For cDNA synthesis, 1 µg of isolated RNA was  
8 transcribed with 100 pmol Oligo(dt)18 (Metabion, Steinkirchen, Germany), 20 U RiboLock RNase  
9 inhibitor (ThermoFisher Scientific), dNTP Mix (0.2 mM for each dNTP), 200 U RevertAid H Minus  
10 reverse transcriptase (ThermoFisher Scientific) in corresponding reaction buffer at 42°C for 60 min.  
11 Target amplification was performed by quantitative reverse transcriptase PCR (qRT-PCR) on the  
12 StepOne real-time system (ThermoFisher Scientific) applying Perfecta SYBR Green Supermix  
13 (ThermoFisher Scientific) and 0.5 µM forward and reverse primer. Following cycling conditions were  
14 applied: initial denaturation at 95 °C for 5 min; 40 cycles of denaturation at 95 °C for 45 sec, annealing  
15 at appropriate temperature (55 °C) for 30 sec and elongation for at 72 °C 30 sec min. Melting curve  
16 profiles were produced and data were analyzed following the  $2^{-dCt}$  algorithm by normalized to  $\beta$ -actin.  
17 Primer sequences are listed in **supplementary table 4**.

18 *P32* exon expression was additionally analyzed by Taqman probes (Thermo Fisher Scientific,  
19 **supplementary table 4**) according to manufacturer's instructions using the StepOnePlus Real-Time  
20 PCR system. The following cycling conditions were applied: preincubation at 50 °C for 2 min and 95  
21 °C for 10 min; 40 cycles of denaturation at 95 °C for 15 sec and annealing and elongation at 60 °C for  
22 1 min. Probe sequences are listed in supplementary table S2. Ct-Values of targets were acquired *via*  
23 the StepOne system software and normalized to  $\beta$ -actin that served as an internal housekeeping  
24 transcript *via* the  $2^{-dCT}$  algorithm.

### 25 **SDS-PAGE and immunoblotting**

26 SDS-PAGE and immunoblotting was performed according to standard protocols. In short, whole-  
27 protein extracts from homogenized tissue samples or cells were prepared by cell lysis in denaturing  
28 lysis buffer containing 1% SDS, 10 mM Tris (pH 7.4), phosphatase II, phosphatase III and protease  
29 inhibitor (Sigma Aldrich). Protein extracts were separated by denaturing sodium dodecyl sulfate



1 polyacrylamide gel electrophoresis (Bio-Rad Laboratories, Hercules, California, US) under reducing  
2 conditions and transferred onto polyvinylidene difluoride membranes. After blocking, membranes were  
3 probed with specific primary antibodies followed by respective HRP-conjugated secondary antibodies.  
4 To determine similar transfer and equal loading, membranes were stripped and reprobed with an  
5 appropriate housekeeper. Proteins of interest were visualized on a ChemiDoc™ XRS+ Imaging  
6 System (Bio-Rad). Applied antibodies are listed in **supplementary table 5**.

## 7 **Histology and microscopy analyses**

8 Immunohistochemical (IHC) staining in paraformaldehyde (PFA)-fixed and paraffin-embedded tissue  
9 biopsies was performed according to standard protocols. After deparaffinization, rehydration,  
10 endogenous peroxidase blockage and antigen retrieval, tissue slides were probed with specific  
11 primary antibodies or isotype control antibodies, followed by respective HRP-conjugated secondary  
12 antibodies or HRP-labelled polymers (both listed in **supplementary table 5**). Tissue slides were  
13 incubated with DAB-substrate (Dako, Jena, Germany) and counterstained with Mayer's hemalum  
14 solution or Alcian-blue. Images were obtained and analyzed on an Axio Scope.A1 microscope (Zeiss,  
15 Oberkochen, Germany) utilizing the ZEN imaging software (Zeiss). If appropriate, stained areas were  
16 quantified *via* the color deconvolution plugin for the software ImageJ (51).

17 For Muc2 immunofluorescent staining and quantification of mucus layer thickness, colonic biopsies  
18 were fixed in Carnoy's solution before paraffin-embedding. Slides were probed with specific antibodies  
19 for murine Muc2 or according isotype control, followed by incubation with respective fluorochrome-  
20 labelled IgG secondary antibody and counterstaining using DAPI (Sigma-Aldrich). Applied antibodies  
21 are listed in **table 5**. Mucus layer thickness was measured at least at four different representative  
22 positions per slide per animal using the AxioCam software.

## 23 **ELISA**

24 For detection of extracellular Muc5AC by ELISA pure supernatant from cells was coated at 4 °C over-  
25 night. Intracellular protein was detected in native protein isolates, coated with 50% coating buffer,  
26 containing 0.3% w/v Na<sub>2</sub>CO<sub>3</sub> \* 10 H<sub>2</sub>O and 0.6% w/v NaHCO<sub>3</sub>, pH 9.6. After blocking, Muc5AC was  
27 detected using a Muc5AC-specific primary antibody in combination with a respective HRP-conjugated  
28 secondary antibody listed in **supplementary table 5**. Optical density was measured at 450 nm against

1 a reference wavelength of 540 nm on a SpectraMax iD3 microplate reader (Molecular Devices, San  
2 José, California, US).

### 3 **Seahorse assay**

4 For determination of OCR and ECAR via Seahorse assay,  $5 \times 10^3$  HT29-MTX cells were seeded in a  
5 Seahorse XF24 cell culture plate in DMEM medium containing 5 mM glucose, 1% non-essential amino  
6 acids, 10% (v/v) heat-inactivated FCS, 100 U/ml penicillin, and 100 mg/ml streptomycin. Cells were  
7 stimulated with 1.25 mM butyrate for 72 hours or were left untreated. OCR and ECAR was determined  
8 in standard Seahorse medium on day three after seeding before and after injection of 2  $\mu$ M oligomycin  
9 on a XF24 analyzer (Agilent) according to manufacturer's instructions.

### 10 **Lactate assay**

11 L-lactate levels were measured in serum or plasma samples (1:5 diluted in PBS) and in cell culture  
12 supernatants (1:10 diluted in PBS) according to manufacturer's instructions (Megazyme, Wicklow,  
13 Ireland). Lactate level in cell culture supernatant were normalized to cell count.

### 14 **Statistics**

15 Statistical analysis was performed using the GraphPad Prism version 6 (San Diego, California, US).  
16 Outliers were identified by Grubbs' test (significant level  $\alpha = 0.05$ ). The F test was used to compare  
17 variances and D'Agostino–Pearson test was applied to test for normal distribution. Statistical  
18 differences between two groups were analyzed by unpaired t-test or paired t-test (normally distributed  
19 data), unpaired t-test with Welch's correction (significant different variances) or Mann–Whitney U-test  
20 (not-normally distributed data). For comparison of more than two groups one-way analysis of  
21 variances (ANOVA) with Bonferroni post-test was applied. Uncorrected Fisher's Least Significant  
22 Difference test was employed for data sets with two variables. Correlation analysis was performed by  
23 obtaining the Spearman's rank correlation coefficient. P-values were calculated and null hypotheses  
24 were rejected when  $p \leq 0.05$ . Data are shown as mean with 95% confidence interval (mean  $\pm$  95% CI),  
25 as mean  $\pm$  standard deviation for small data sets (mean  $\pm$  SD) or median with interquartile range for  
26 data sets with large variances.

27

1 **AUTHOR CONTRIBUTIONS**

2 CS and SD designed the concept of the study and supervised it. HS, AB, DB and SP collected and  
3 provided human biopsy samples. MiH and SI were in charge of breeding of conplastic B6-mtFVB mice.  
4 AGS, EIP and BG provided expertise on p32 and an antibody against p32 exon 6. AS, MaH, HeS, KS,  
5 MR and AR performed the experiments and acquired the data. AS and SD analyzed and interpreted  
6 the data. AS, SD and CS drafted the article. All authors read and approved to the final manuscript.

7 **ACKNOWLEDGMENTS**

8 The authors thank all the participating patients for agreeing to support this study, Prof. Jan Rupp for  
9 providing the Seahorse XF24 analyzer from Agilent and Prof. Huber-Lang for sharing the T84 cell line.

10 This work was supported by the German Research Foundation (Research grants SI 1518/3-1 to CS  
11 and DE 1874/1-2 to SD), the National Institutes of Allergy and Infectious Diseases, US (R01 AI  
12 060866, R01 AI-084178, and R56-AI 1223476 to BG) and the NIH/NCI cancer support grant, US (P30  
13 CA008748 to the Memorial Sloan-Kettering Cancer Center). CS is Fresenius Kabi endowed professor  
14 for Nutritional Medicine.

15 **CONFLICT OF INTERESTS**

16 The authors declare no conflict of interests with the exception of Dr. Ghebrehiwet and Dr. Peerschke,  
17 who receive royalties from the sale of monoclonal antibodies against gC1qR clone 60.11, clone 74.5.2  
18 and gC1qR assay.

19

## 1 REFERENCES

- 2 1. Ungaro R, Mehandru S, Allen PB, Peyrin-Biroulet L, and Colombel JF. Ulcerative colitis.  
3 *Lancet*. 2017;389(10080):1756-70.
- 4 2. Stringari C, Edwards RA, Pate KT, Waterman ML, Donovan PJ, and Gratton E. Metabolic  
5 trajectory of cellular differentiation in small intestine by Phasor Fluorescence Lifetime  
6 Microscopy of NADH. *Sci Rep*. 2012;2(568).
- 7 3. Roediger WE. The colonic epithelium in ulcerative colitis: an energy-deficiency disease?  
8 *Lancet*. 1980;2(8197):712-5.
- 9 4. Sifroni KG, Damiani CR, Stoffel C, Cardoso MR, Ferreira GK, Jeremias IC, Rezin GT, Scaini G,  
10 Schuck PF, Dal-Pizzol F, et al. Mitochondrial respiratory chain in the colonic mucosal of  
11 patients with ulcerative colitis. *Mol Cell Biochem*. 2010;342(1-2):111-5.
- 12 5. Santhanam S, Rajamanickam S, Motamarri A, Ramakrishna BS, Amirtharaj JG, Ramachandran  
13 A, Pulimood A, and Venkatraman A. Mitochondrial electron transport chain complex  
14 dysfunction in the colonic mucosa in ulcerative colitis. *Inflamm Bowel Dis*. 2012;18(11):2158-  
15 68.
- 16 6. Pullan RD, Thomas GA, Rhodes M, Newcombe RG, Williams GT, Allen A, and Rhodes J.  
17 Thickness of adherent mucus gel on colonic mucosa in humans and its relevance to colitis.  
18 *Gut*. 1994;35(3):353-9.
- 19 7. Johansson ME. Mucus layers in inflammatory bowel disease. *Inflamm Bowel Dis*.  
20 2014;20(11):2124-31.
- 21 8. Gersemann M, Becker S, Kubler I, Koslowski M, Wang G, Herrlinger KR, Griger J, Fritz P,  
22 Fellermann K, Schwab M, et al. Differences in goblet cell differentiation between Crohn's  
23 disease and ulcerative colitis. *Differentiation*. 2009;77(1):84-94.
- 24 9. McCormick DA, Horton LW, and Mee AS. Mucin depletion in inflammatory bowel disease. *J*  
25 *Clin Pathol*. 1990;43(2):143-6.

- 1 10. Ito K, and Suda T. Metabolic requirements for the maintenance of self-renewing stem cells.  
2 *Nat Rev Mol Cell Biol.* 2014;15(4):243-56.
- 3 11. Kaiko GE, Ryu SH, Koues OI, Collins PL, Solnica-Krezel L, Pearce EJ, Pearce EL, Oltz EM, and  
4 Stappenbeck TS. The Colonic Crypt Protects Stem Cells from Microbiota-Derived Metabolites.  
5 *Cell.* 2016;167(4):1137.
- 6 12. Xu X, Duan S, Yi F, Ocampo A, Liu GH, and Izpisua Belmonte JC. Mitochondrial regulation in  
7 pluripotent stem cells. *Cell Metab.* 2013;18(3):325-32.
- 8 13. Smith SA, Ogawa SA, Chau L, Whelan KA, Hamilton KE, Chen J, Tan L, Chen EZ, Keilbaugh S,  
9 Fogt F, et al. Mitochondrial dysfunction in inflammatory bowel disease alters intestinal  
10 epithelial metabolism of hepatic acylcarnitines. *J Clin Invest.* 2020.
- 11 14. Sünderhauf A, Raschdorf A, Hicken H, and Schlichting H. GC1qR cleavage by caspase-1 drives  
12 aerobic glycolysis in tumor cells. *Frontiers in Oncology.* 2020.
- 13 15. Yang Q, Bermingham NA, Finegold MJ, and Zoghbi HY. Requirement of Math1 for secretory  
14 cell lineage commitment in the mouse intestine. *Science.* 2001;294(5549):2155-8.
- 15 16. Noah TK, Kazanjian A, Whitsett J, and Shroyer NF. SAM pointed domain ETS factor (SPDEF)  
16 regulates terminal differentiation and maturation of intestinal goblet cells. *Exp Cell Res.*  
17 2010;316(3):452-65.
- 18 17. Katz JP, Perreault N, Goldstein BG, Lee CS, Labosky PA, Yang VW, and Kaestner KH. The zinc-  
19 finger transcription factor Klf4 is required for terminal differentiation of goblet cells in the  
20 colon. *Development.* 2002;129(11):2619-28.
- 21 18. Gunther C, Neumann H, Neurath MF, and Becker C. Apoptosis, necrosis and necroptosis: cell  
22 death regulation in the intestinal epithelium. *Gut.* 2013;62(7):1062-71.
- 23 19. Krainer AR, Mayeda A, Kozak D, and Binns G. Functional expression of cloned human splicing  
24 factor SF2: homology to RNA-binding proteins, U1 70K, and Drosophila splicing regulators.  
25 *Cell.* 1991;66(2):383-94.

- 1 20. Honore B, Madsen P, Rasmussen HH, Vandekerckhove J, Celis JE, and Leffers H. Cloning and  
2 expression of a cDNA covering the complete coding region of the P32 subunit of human pre-  
3 mRNA splicing factor SF2. *Gene*. 1993;134(2):283-7.
- 4 21. Ghebrehiwet B, Lim BL, Peerschke EI, Willis AC, and Reid KB. Isolation, cDNA cloning, and  
5 overexpression of a 33-kD cell surface glycoprotein that binds to the globular "heads" of C1q.  
6 *J Exp Med*. 1994;179(6):1809-21.
- 7 22. D'Souza M, and Datta K. Evidence for naturally occurring hyaluronic acid binding protein in  
8 rat liver. *Biochem Int*. 1985;10(1):43-51.
- 9 23. Fogal V, Richardson AD, Karmali PP, Scheffler IE, Smith JW, and Ruoslahti E. Mitochondrial  
10 p32 protein is a critical regulator of tumor metabolism via maintenance of oxidative  
11 phosphorylation. *Mol Cell Biol*. 2010;30(6):1303-18.
- 12 24. Yagi M, Uchiumi T, Takazaki S, Okuno B, Nomura M, Yoshida S, Kanki T, and Kang D.  
13 p32/gC1qR is indispensable for fetal development and mitochondrial translation: importance  
14 of its RNA-binding ability. *Nucleic Acids Res*. 2012;40(19):9717-37.
- 15 25. Hillman GA, and Henry MF. The yeast protein Mam33 functions in the assembly of the  
16 mitochondrial ribosome. *J Biol Chem*. 2019;294(25):9813-29.
- 17 26. Lonsdale J, Thomas J, Salvatore M, Phillips R, Lo E, Shad S, Hasz R, Walters G, Garcia F, Young  
18 N, et al. The Genotype-Tissue Expression (GTEx) project. *Nature Genetics*. 2013;45(6):580-5.
- 19 27. Sun N, Youle RJ, and Finkel T. The Mitochondrial Basis of Aging. *Mol Cell*. 2016;61(5):654-66.
- 20 28. Schroll S, Sarlette A, Ahrens K, Manns MP, and Goke M. Effects of azathioprine and its  
21 metabolites on repair mechanisms of the intestinal epithelium in vitro. *Regul Pept*.  
22 2005;131(1-3):1-11.
- 23 29. Lei-Leston AC, Murphy AG, and Maloy KJ. Epithelial Cell Inflammasomes in Intestinal  
24 Immunity and Inflammation. *Front Immunol*. 2017;8(1168).

- 1 30. Navabi N, McGuckin MA, and Linden SK. Gastrointestinal cell lines form polarized epithelia  
2 with an adherent mucus layer when cultured in semi-wet interfaces with mechanical  
3 stimulation. *PLoS One*. 2013;8(7):e68761.
- 4 31. Yu X, Gimsa U, Wester-Rosenlof L, Kanitz E, Otten W, Kunz M, and Ibrahim SM. Dissecting the  
5 effects of mtDNA variations on complex traits using mouse conplastic strains. *Genome Res*.  
6 2009;19(1):159-65.
- 7 32. Hirose M, Kunstner A, Schilf P, Sunderhauf A, Rupp J, Jöhren O, Schwaninger M, Sina C,  
8 Baines JF, and Ibrahim SM. Mitochondrial gene polymorphism is associated with gut  
9 microbial communities in mice. *Sci Rep*. 2017;7(1):15293.
- 10 33. Schroder T, Kucharczyk D, Bar F, Pagel R, Derer S, Jendrek ST, Sunderhauf A, Brethack AK,  
11 Hirose M, Moller S, et al. Mitochondrial gene polymorphisms alter hepatic cellular energy  
12 metabolism and aggravate diet-induced non-alcoholic steatohepatitis. *Mol Metab*.  
13 2016;5(4):283-95.
- 14 34. Palm W, and Thompson CB. Nutrient acquisition strategies of mammalian cells. *Nature*.  
15 2017;546(7657):234-42.
- 16 35. Khaloian S, Rath E, Hammoudi N, Gleisinger E, Blutke A, Giesbertz P, Berger E, Metwaly A,  
17 Waldschmitt N, Allez M, et al. Mitochondrial impairment drives intestinal stem cell transition  
18 into dysfunctional Paneth cells predicting Crohn's disease recurrence. *Gut*. 2020.
- 19 36. Johansson ME, Gustafsson JK, Holmen-Larsson J, Jabbar KS, Xia L, Xu H, Ghishan FK, Carvalho  
20 FA, Gewirtz AT, Sjövall H, et al. Bacteria penetrate the normally impenetrable inner colon  
21 mucus layer in both murine colitis models and patients with ulcerative colitis. *Gut*.  
22 2014;63(2):281-91.
- 23 37. Torres J. CAN WE PREDICT / PREVENT IBD? *DDW*. 2018:20.  
24 [https://static.livemediagr.com/livemediagr/documents/al26698\\_us80\\_20190601172921\\_01.torres](https://static.livemediagr.com/livemediagr/documents/al26698_us80_20190601172921_01.torres.pdf)  
25 .pdf.

- 1 38. Yu X, Wieczorek S, Franke A, Yin H, Pierer M, Sina C, Karlsen TH, Boberg KM, Bergquist A,  
2 Kunz M, et al. Association of UCP2 -866 G/A polymorphism with chronic inflammatory  
3 diseases. *Genes Immun*. 2009;10(6):601-5.
- 4 39. Waller S, Tremelling M, Bredin F, Godfrey L, Howson J, and Parkes M. Evidence for  
5 association of OCTN genes and IBD5 with ulcerative colitis. *Gut*. 2006;55(6):809-14.
- 6 40. Zhang H, Kuai XY, Yu P, Lin L, and Shi R. Protective role of uncoupling protein-2 against  
7 dextran sodium sulfate-induced colitis. *J Gastroenterol Hepatol*. 2012;27(3):603-8.
- 8 41. Shekhawat PS, Srinivas SR, Matern D, Bennett MJ, Boriack R, George V, Xu H, Prasad PD,  
9 Roon P, and Ganapathy V. Spontaneous development of intestinal and colonic atrophy and  
10 inflammation in the carnitine-deficient jvs (OCTN2(-/-)) mice. *Mol Genet Metab*.  
11 2007;92(4):315-24.
- 12 42. Bar F, Bochmann W, Widok A, von Medem K, Pagel R, Hirose M, Yu X, Kalies K, Konig P, Bohm  
13 R, et al. Mitochondrial gene polymorphisms that protect mice from colitis. *Gastroenterology*.  
14 2013;145(5):1055-63 e3.
- 15 43. Saha P, and Datta K. Multi-functional, multicompartamental hyaluronan-binding protein 1  
16 (HABP1/p32/gC1qR): implication in cancer progression and metastasis. *Oncotarget*.  
17 2018;9(12):10784-807.
- 18 44. Peerschke EI, and Ghebrehiwet B. The contribution of gC1qR/p33 in infection and  
19 inflammation. *Immunobiology*. 2007;212(4-5):333-42.
- 20 45. Yang VW, Liu Y, Kim J, Shroyer KR, and Bialkowska AB. Increased Genetic Instability and  
21 Accelerated Progression of Colitis-Associated Colorectal Cancer through Intestinal  
22 Epithelium-specific Deletion of Klf4. *Mol Cancer Res*. 2019;17(1):165-76.
- 23 46. Dupaul-Chicoine J, Yeretssian G, Doiron K, Bergstrom KS, McIntire CR, LeBlanc PM, Meunier  
24 C, Turbide C, Gros P, Beauchemin N, et al. Control of intestinal homeostasis, colitis, and  
25 colitis-associated colorectal cancer by the inflammatory caspases. *Immunity*. 2010;32(3):367-  
26 78.



- 1 47. Rizzello F, Spisni E, Giovanardi E, Imbesi V, Salice M, Alvisi P, Valerii MC, and Gionchetti P.  
2 Implications of the Westernized Diet in the Onset and Progression of IBD. *Nutrients*.  
3 2019;11(5).
- 4 48. Ahechu P, Zozaya G, Marti P, Hernandez-Lizoain JL, Baixauli J, Unamuno X, Fruhbeck G, and  
5 Catalan V. NLRP3 Inflammasome: A Possible Link Between Obesity-Associated Low-Grade  
6 Chronic Inflammation and Colorectal Cancer Development. *Front Immunol*. 2018;9(2918).
- 7 49. Christ A, Gunther P, Lauterbach MAR, Duewell P, Biswas D, Pelka K, Scholz CJ, Oosting M,  
8 Haendler K, Bassler K, et al. Western Diet Triggers NLRP3-Dependent Innate Immune  
9 Reprogramming. *Cell*. 2018;172(1-2):162-75 e14.
- 10 50. Olive M, Untawale S, Coffey RJ, Siciliano MJ, Wildrick DM, Fritsche H, Pathak S, Cherry LM,  
11 Blick M, Lointier P, et al. Characterization of the DiFi rectal carcinoma cell line derived from a  
12 familial adenomatous polyposis patient. *In Vitro Cell Dev Biol*. 1993;29A(3 Pt 1):239-48.
- 13 51. Ruifrok AC, and Johnston DA. Quantification of histochemical staining by color  
14 deconvolution. *Anal Quant Cytol Histol*. 2001;23(4):291-9.
- 15 52. Reef S, Shifman O, Oren M, and Kimchi A. The autophagic inducer smARF interacts with and  
16 is stabilized by the mitochondrial p32 protein. *Oncogene*. 2007;26(46):6677-83.
- 17

1

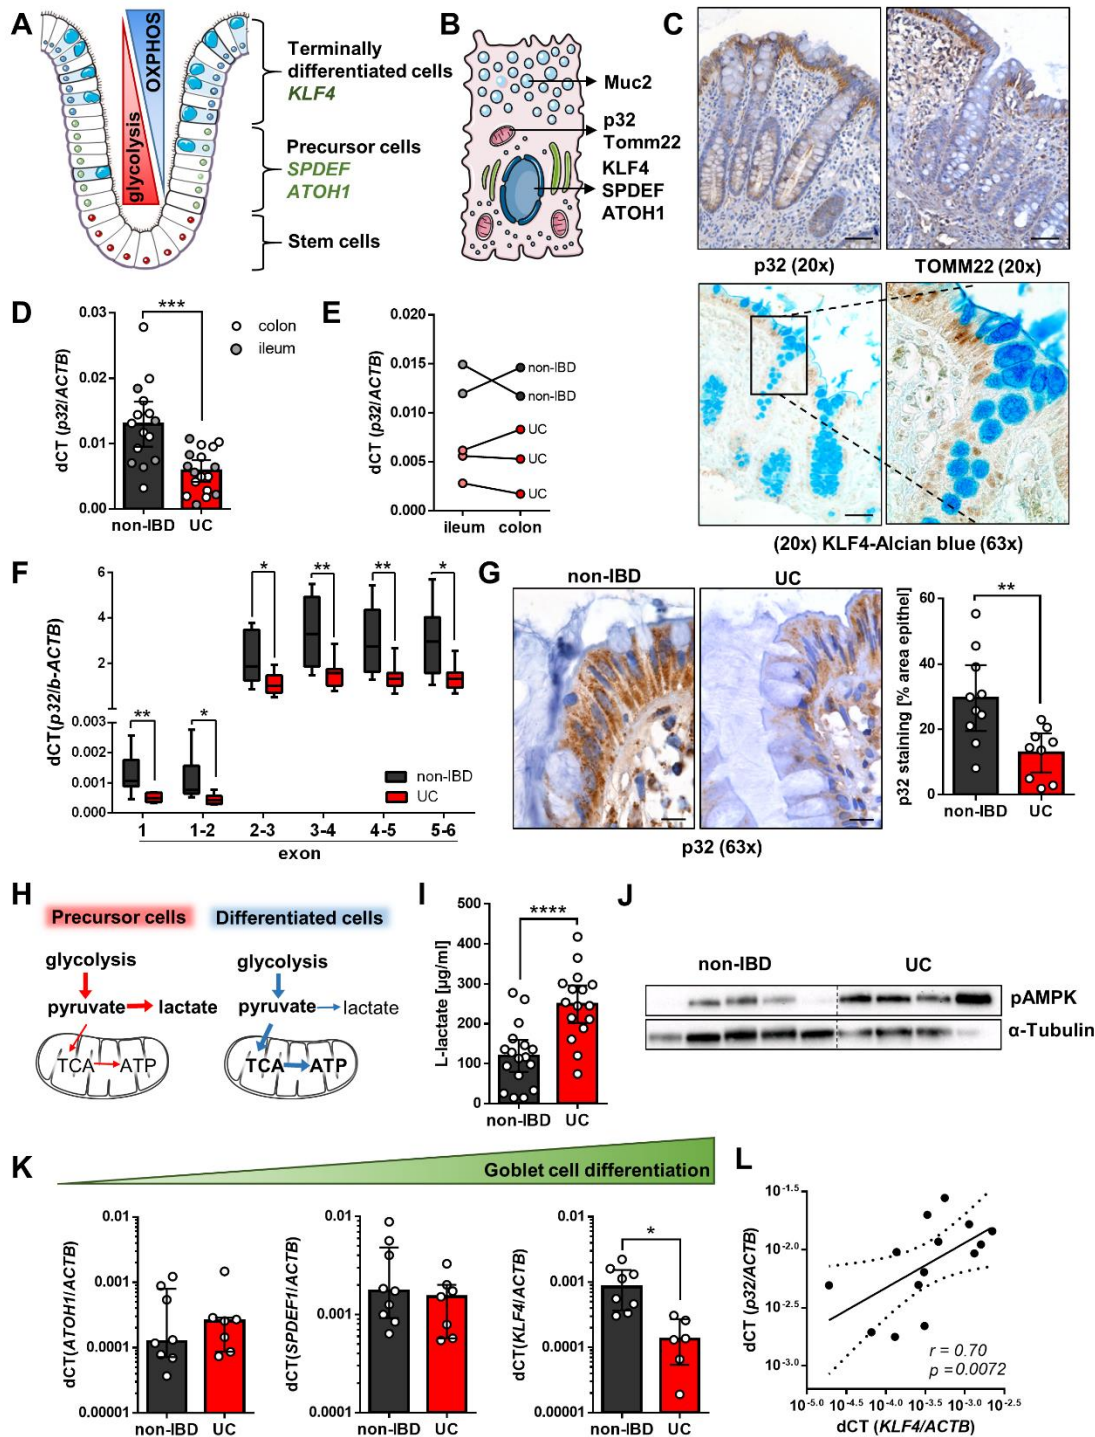

**Figure 1: UC patients in remission display reduced p32 level, mucosal energy deficiency and impaired goblet cell differentiation.** **A)** A model for energy generation and goblet cell differentiation in the colonic crypt and **B)** schematic subcellular localization of proteins of interest were generated by modifying images from Servier Medical Art (52). **C)** Representative IHC staining of p32 (clone EPR8871), Tomm22 and KLF4 in human colonic biopsies. Scale bar = 50  $\mu$ m. Expression of transcripts of interest was measured by qRT-PCR in **D)** and **E)** ileal and colonic biopsies and **K)** colonic biopsies from non-IBD and UC patients in remission. **F)** P32 exon expression was analyzed by taqman assay. Non-IBD: n = 10; UC: n = 7 and 6 for exon 1 and exon 1-2, respectively and n = 8-9 for all other exon junctions. **G)** Representative IHC staining and corresponding quantification of p32 (clone EPR8871) expression in the upper part of the colonic crypt in biopsies from non-IBD controls and UC patients in remission. Scale bar = 10  $\mu$ m **H)** Schematic visualization of energy generation in the intestinal crypt. **I)** L-lactate level were measured in serum or plasma samples and **J)** WB experiments were performed in colonic biopsies from non-IBD controls and UC patients in remission. **L)** Colonic p32 mRNA expression was correlated against KLF4 mRNA expression in non-IBD controls and UC patients in remission. **D), F)** and **K)** Unpaired t-test with Welch's correction; **G)** and **I)** Unpaired t-test; **L)** Spearman's rank correlation coefficient; results are shown as **D), G)** and **I)** mean  $\pm$  95% CI; **F)** Box & whiskers plot min to max; **K)** median  $\pm$  interquartile range; \*  $p \leq 0.05$ , \*\*  $p \leq 0.01$ , \*\*\*  $p \leq 0.001$ , \*\*\*\*  $p \leq 0.0001$ .

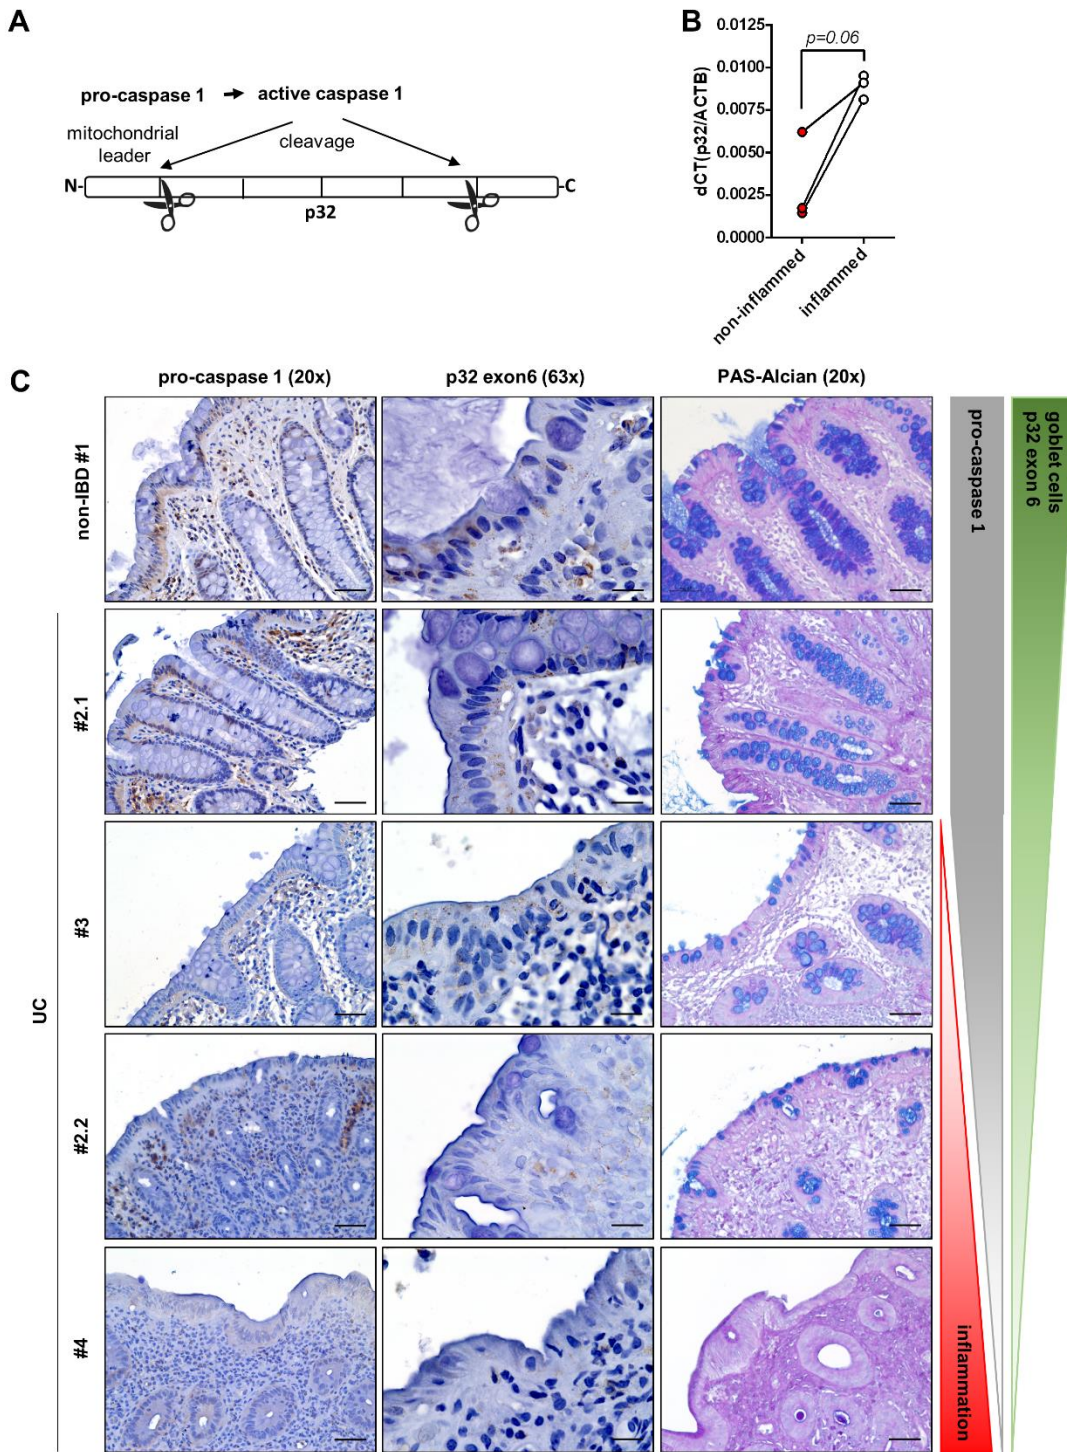

1  
2 **Figure 2: Goblet cell loss correlates with inflammasome activation and decrease of full-length p32 level in**  
3 **active UC. A)** Schematic visualization of p32 cleavage by active Caspase-1. **B)** P32 mRNA expression in paired  
4 biopsies from non-inflamed and inflamed intestinal tissue sections were quantified by qRT-PCR. **C)** Representative  
5 IHC staining against pro-caspase1 and p32 exon 6 as well as PAS-Alcian staining in tissue biopsies from the  
6 descending colon or sigma; #1: non-IBD non-inflamed; #2.1: UC non-inflamed; #3 UC low grade inflammation; #2.2  
7 UC medium-grade inflammation; #4 UC high grade inflammation. Representative images from 8 biopsies each  
8 categorized as non-IBD controls or UC non-inflamed and 5 UC inflamed samples are displayed. Scale bar = 50  $\mu$ M **B)**  
9 Paired t-test.  
10

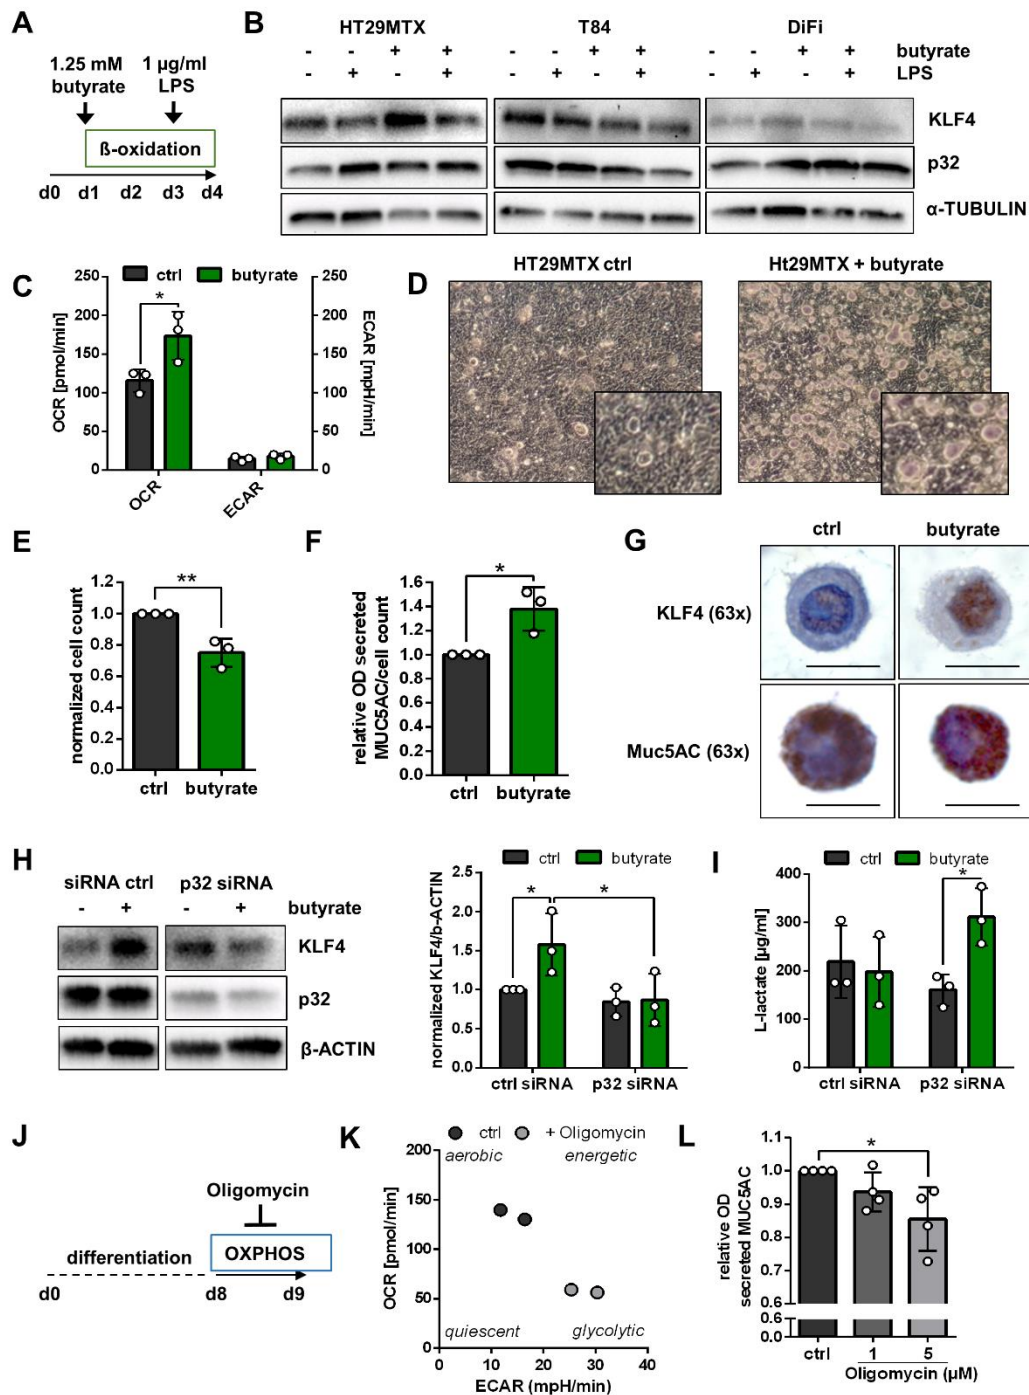

**Figure 3: Mucin secretion and goblet cell differentiation is dependent on energy supplied by mitochondrial respiration.** **A)** and **J)** Graphical setup of cell culture experiments. **B)** WB experiments were performed from whole protein extracts with respective antibodies in cells stimulated with 1.25 mM butyrate and/or 1 µg/ml LPS (p32 clone EPR8871). **C)** Basal oxygen consumption rate (OCR) and extracellular acidification rate (ECAR) were measured by Seahorse assay (14). **D)** Representative image of HT29-MTX cell growth characteristics. **E)** Cell counts are presented as fold change for each individual experiment. **F)** Muc5AC level in the supernatant were measured by ELISA, normalized to cell count and are displayed as fold change for each individual experiment. **G)** KLF4 and MUC5AC IHC staining was performed in paraffin-embedded butyrate-stimulated or control HT29-MTX cells. Scale bar = 10 µM. **H)** to **I)** For siRNA knockdown, HT29-MTX cells were stimulated with 50 nM p32 siRNA or respective control for 96 hours and butyrate for 72 hours. **H)** Representative WB and quantification from whole protein extracts (p32 clone 60.11) and **I)** L-Lactate level from corresponding cell culture supernatants. **K)** Seahorse measurement of HT29-MTX cells before and after 2 µM oligomycin injection **L)** Muc5AC level in the cell culture supernatant after 24h stimulation with oligomycin was measured by ELISA and normalized to each control. **C)** paired t-test; **E)** and **F)** unpaired t-test; **H)** and **I)** uncorrected Fisher's test **L)** One-way ANOVA with Bonferroni's post-hoc test; results are shown from 3 independent experiments with the exception of **K)** n = 2; Data are shown as mean ± SD; \* p ≤ 0.05, \*\* p ≤ 0.01.

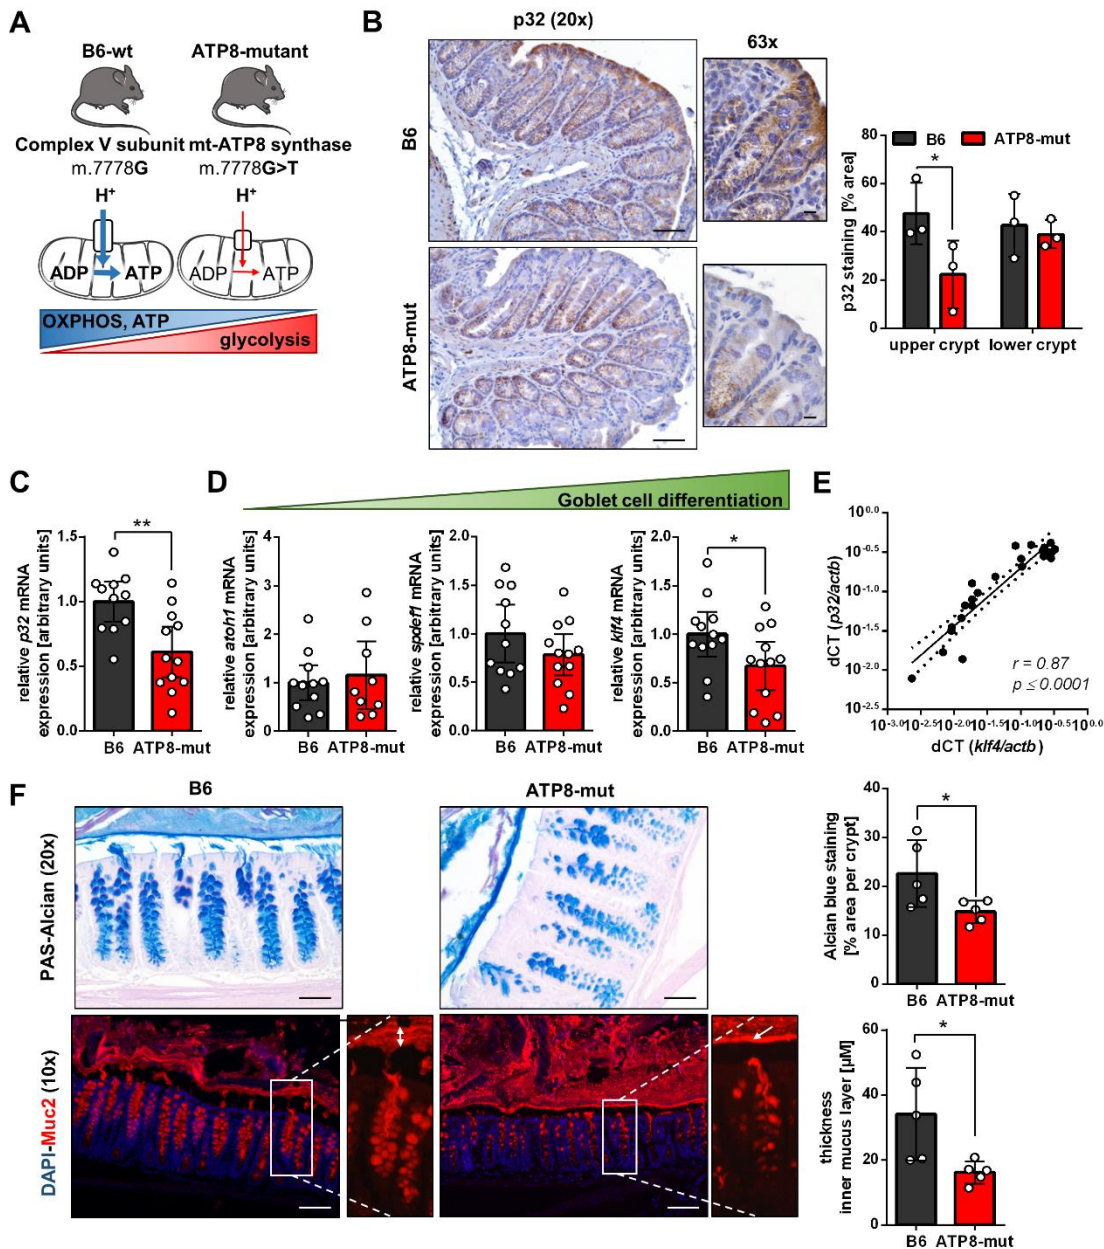

1  
2 **Figure 4: Mitochondrial dysfunction in mice is accompanied by defective goblet cell differentiation. A)**  
3 Schematic overview of the mutation in subunit 8 of the ATP-synthase in ATP8-mut mice and published metabolic  
4 imbalance (32, 33). **B)** Representative IHC staining and according quantification of p32 (clone EPR8871) expression  
5 in colonic biopsies of B6-wt and ATP8-mut mice (n = 3 mice per group). Scale bar 20x = 50  $\mu$ M; scale bar 63x = 10  
6  $\mu$ M. **C)** and **D)** Expression of transcripts of interest was performed by qRT-PCR in colonic biopsies from B6-wt and  
7 ATP8-mut mice. Data were normalized to  $\beta$ -actin and are displayed as relative values to B6-wt mice for each sampling  
8 round. **E)** Colonic p32 mRNA expression was correlated against klf4 mRNA expression in B6-wt and ATP8-mut mice.  
9 **F)** Representative PAS-Acian and Muc2 fluorescent staining with according quantification in Carnoy's fixed colonic  
10 tissue samples from B6-wt and ATP8-mut mice. Scale bar PAS-Acian = 50  $\mu$ M; scale bar Muc2 IF = 100  $\mu$ M. Arrow  
11 indicates inner mucus layer. **B)** to **D)** Unpaired t-test; **E)** Spearman's rank correlation coefficient; **F)** unpaired t-test  
12 with Welch's correction; **B)** and **F)** results are shown as mean  $\pm$  SD; **C)** and **D)** results are shown as mean  $\pm$  95% CI; \*  
13  $p \leq 0.05$ , \*\*  $p \leq 0.01$ .  
14

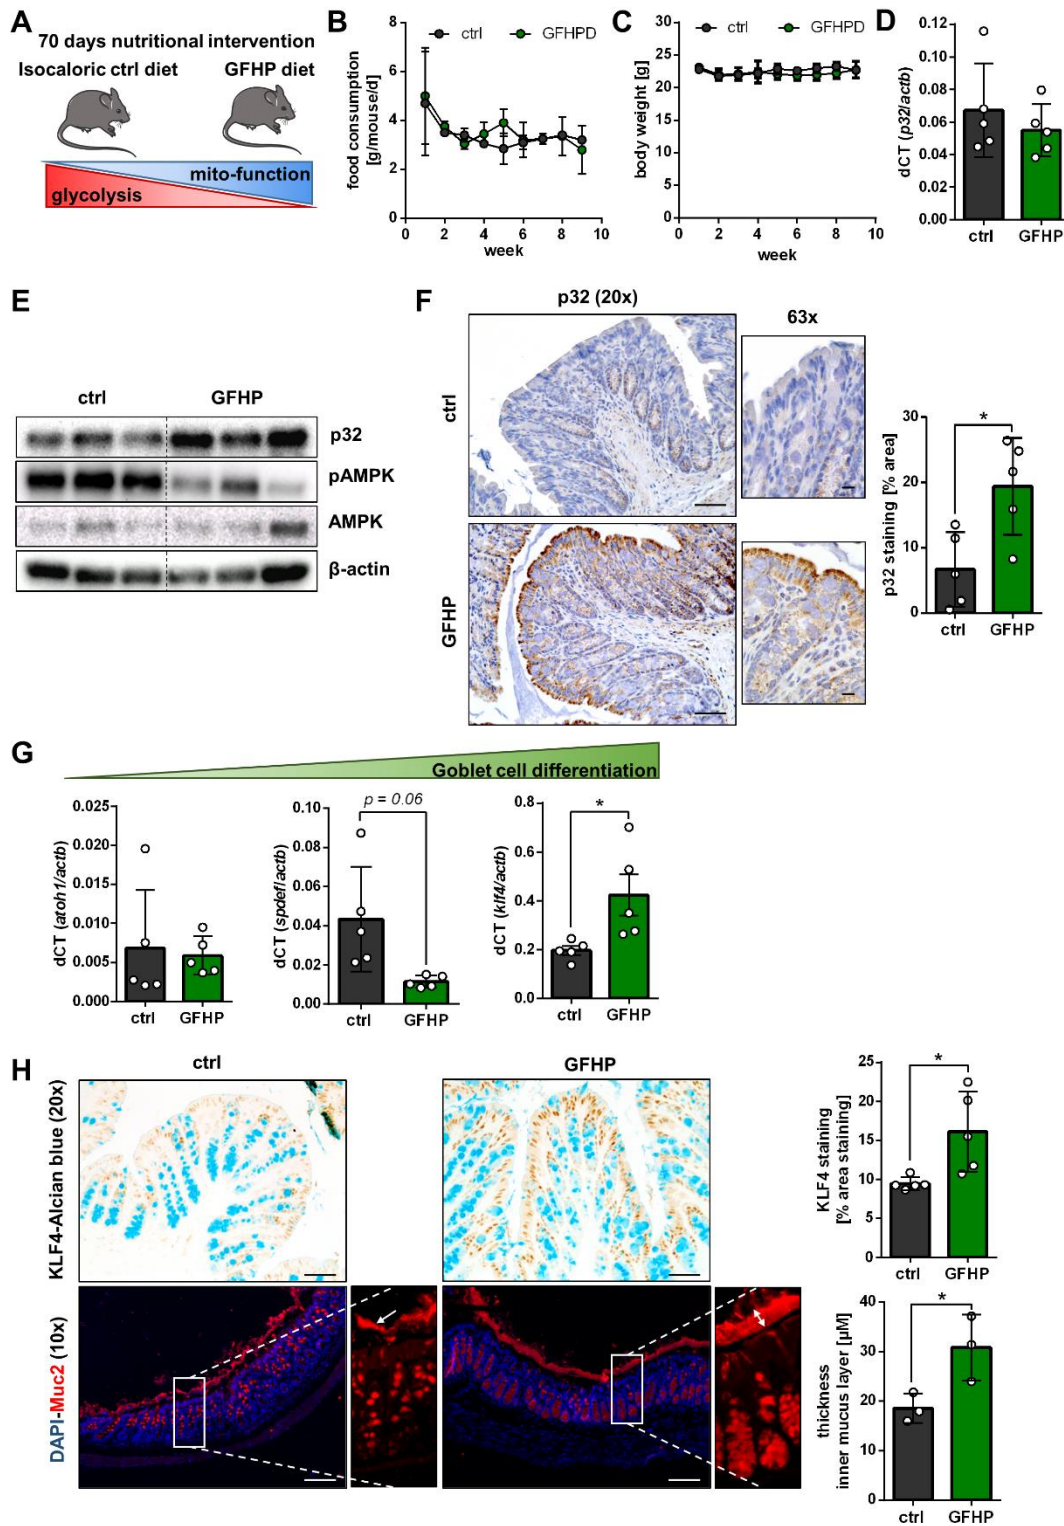

**Figure 5: GFHP diet increased mucosal energy supply, induces colonic p32 protein expression and promoted goblet cell differentiation.** **A)** Hypothesized metabolic switch upon glucose free high protein (GFHP) dietary intervention in mice. Weekly, **B)** food consumption and **C)** mice body weight was determined ( $n = 6$  from two independent experiments). Expression of transcripts was measured **D)** via taqman probes for p32 exon 3-4 or **G)** by SYBR qRT-PCR in colonic biopsies from ctrl and GFHP diet mice. **E)** WB experiment of whole protein extracts from colonic samples from ctrl and GFHP mice (p32 clone EPR8871). **F)** and **H)** Representative p32 (clone EPR8871) and KLF4-Alcian blue IHC staining of PFA-fixed colonic tissue samples as well as MUC2 fluorescent staining of Carnoy's fixed tissue are presented with corresponding quantifications. Scale bar 10x = 100  $\mu$ M; scale bar 20x = 50  $\mu$ M; scale bar 63x = 10  $\mu$ M. Arrow indicates inner mucus layer. **F)** and **H)** (thickness of inner mucus layer) Unpaired t-test; **G)** and **H)** (KLF4 staining) unpaired t-test with Welch's correction; results are shown as mean  $\pm$  SD; \*  $p \leq 0.05$ , \*\*  $p \leq 0.01$ .

1 **Table 1: Patients' characteristics native and paraffin-embedded biopsies**

|                                           | P32 mRNA expression              |            | IHC analysis          |                        |                    |
|-------------------------------------------|----------------------------------|------------|-----------------------|------------------------|--------------------|
| <b>Total number of patients included</b>  | <b>38</b>                        |            | <b>24</b>             |                        |                    |
| Non-IBD                                   | 15 (39.5%)                       |            | 10 (41.7%)            |                        |                    |
| UC remission non-inflamed                 | 23 (60.5%)                       |            | 9 (37.5%)             |                        |                    |
| UC inflamed                               | -                                |            | 5 (20.8%)             |                        |                    |
| <b>Gender ratio women : men (unknown)</b> |                                  |            |                       |                        |                    |
| Non-IBD                                   | 7 (46.7%) : 7 (46.7%) (1 (6.7%)) |            | 5 (50.0%) : 5 (50.0%) |                        |                    |
| UC remission non-inflamed                 | 12 (52.2%) : 11 (47.8%)          |            | 7 (77.8%) : 2 (22.2%) |                        |                    |
| UC inflamed                               | -                                |            | 3 (60.0%) : 2 (40.0%) |                        |                    |
| <b>Mean age ± SD (unknown)</b>            |                                  |            |                       |                        |                    |
| Non-IBD                                   | 61.4 ± 17.9 (1)                  |            | 53.4 ± 11.3           |                        |                    |
| UC remission non-inflamed                 | 50.2 ± 16.6 (1)                  |            | 60.0 ± 13.5           |                        |                    |
| UC inflamed                               | -                                |            | 51.6 ± 7.7            |                        |                    |
| <b>Origin of biopsies</b>                 | <b>Non-IBD</b>                   | <b>UC</b>  | <b>Non-IBD</b>        | <b>UC non-inflamed</b> | <b>UC inflamed</b> |
| Ileum                                     | 4 (26.7%)                        | 5 (21.7%)  | -                     | -                      | -                  |
| Caecum                                    | -                                | 4 (17.4%)  | -                     | -                      | -                  |
| C. ascendence                             | 2 (13.3%)                        | 2 (8.7%)   | -                     | -                      | -                  |
| Flexura hepatica                          | 1 (6.7%)                         | -          | -                     | -                      | -                  |
| C. transversum                            | 1 (6.7%)                         | 1 (4.3%)   | 1 (10.0%)             | -                      | -                  |
| C. descendence                            | -                                | 1 (4.3%)   | 3 (30.0%)             | 3 (33.3%)              | 1 (20.0%)          |
| C. sigmoideum                             | 6 (40.0%)                        | 9 (39.1%)  | 6 (60.0%)             | 6 (66.7%)              | 4 (80.0%)          |
| Rectum                                    | 1 (6.7 %)                        | 1 (4.3%)   | -                     | -                      | -                  |
| Colon unclassified                        | -                                | -          | 1 (10.0%)             | 1 (11.1%)              | -                  |
| <b>Medication</b>                         | <b>Non-IBD</b>                   | <b>UC</b>  | <b>Non-IBD</b>        | <b>UC non-inflamed</b> | <b>UC inflamed</b> |
| Mesalazine/Mesalazine klysmen             | -                                | 12 (52.2%) | -                     | 5 (55.6%)              | 2 (40.0%)          |
| Prednisone                                | -                                | 6 (26.1%)  | 1 (10.0%)             | -                      | 2 (40.0%)          |
| Azathioprine                              | -                                | 5 (21.7%)  | -                     | -                      | -                  |
| Sulfasalazine                             | -                                | 2 (8.7%)   | -                     | 1 (11.1%)              | -                  |
| Tacrolimus                                | -                                | 2 (8.7%)   | -                     | -                      | 1 (20.0%)          |
| Budesonide klysmen                        | -                                | -          | -                     | -                      | 2 (40.0%)          |
| Metronidazole                             | -                                | -          | 1 (10%)               | -                      | 1 (20.0%)          |
| Sirolimus                                 | -                                | 1 (4.3%)   | -                     | -                      | -                  |
| Hydrocortisone rectal foam                | -                                | 1 (4.3%)   | -                     | -                      | -                  |
| Olsalazine                                | -                                | 1 (4.3%)   | -                     | -                      | -                  |
| Ciprofloxacin                             | 1 (6.7%)                         | -          | 3 (30.0 %)            | 1 (11.1 %)             | 1 (20.0 %)         |

2  
3

1 **Table 2: Patients' characteristics serum samples and western blot biopsies**

|                                          | <b>Serum/plasma</b>   | <b>WB analysis</b>  |           |
|------------------------------------------|-----------------------|---------------------|-----------|
| <b>Total number of patients included</b> | <b>33</b>             | <b>9</b>            |           |
| Non-IBD                                  | 17 (51.5%)            | 5 (55.6%)           |           |
| UC remission                             | 16 (48.5%)            | 4 (44.4%)           |           |
| <b>Gender ratio women : men</b>          |                       |                     |           |
| Non-IBD                                  | 9 (52.9%) : 8 (47.1%) | 3 (60.0%) : 2 (40%) |           |
| UC remission                             | 7 (43.8%) : 9 (56.3%) | 1 (25%) : 3 (75%)   |           |
| <b>Mean age ± SD (unknown)</b>           |                       |                     |           |
| Non-IBD                                  | 30.3 ± 9.7            | 49.8 ± 24.2         |           |
| UC remission                             | 43.8 ± 7.7 (10)       | 60.15 ± 17.04       |           |
| <b>Origin of biopsies</b>                | Not applicable        | <b>Non-IBD</b>      | <b>UC</b> |
| Caecum                                   |                       | -                   | 1 (25.0%) |
| C. ascendence                            |                       | 1 (20.0%)           | 1 (25.0%) |
| Flexura hepatica                         |                       | 1 (20.0%)           | --        |
| C. descendence                           |                       | 1 (20.0%)           | 1 (25.0%) |
| C. sigmoideum                            |                       | 1 (20.0%)           | -         |
| Rectum                                   |                       | 1 (20.0%)           | 1 (25.0%) |
| <b>Medication</b>                        | <b>UC</b>             | <b>UC</b>           |           |
| Mesalazine/Mesalazine klysmen            | 15 (93.8%)            | 2 (50%)             |           |
| TNF-α inhibitors                         | 8 (50.0%)             | -                   |           |
| Prednisone                               | 1 (6.3%)              | 2 (50%)             |           |
| Vedolizumab                              | 3 (18.8%)             | -                   |           |
| Budesonide klysmen                       | 2 (12.5%)             | -                   |           |
| Thiopurines                              | 2 (12.5%)             | -                   |           |
| Hydrocortisone rectal foam               | -                     | 1 (25%)             |           |
| Ciprofloxacin                            | -                     | 1 (25%)             |           |
| Sulfasalazine                            | -                     | 1 (25%)             |           |
| Tacrolimus                               | -                     | 1 (25%)             |           |

2
